# Supplementary material
Source: HighWire-hosted journal article supplement (https://erj.ersjournals.com/content/60/3/2200801)
Supplement: inline-supplementary-material-1 [file inline-supplementary-material-1.pdf]

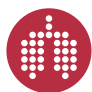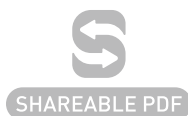

# Risk assessment of systemic sclerosis-associated pulmonary arterial hypertension: cardiac index *versus* stroke volume index

Hussein J. Hassan<sup>1</sup>, Mario Naranjo <sup>1</sup>, Brigitte Kazzi<sup>1</sup>, Traci Houston-Harris<sup>1</sup>, Steven Hsu<sup>2</sup>, Aparna Balasubramanian<sup>1</sup>, Catherine E. Simpson <sup>1</sup>, Rachel L. Damico<sup>1</sup>, Todd M. Kolb <sup>1</sup>, Stephen C. Mathai <sup>1</sup> and Paul M. Hassoun<sup>1</sup>

<sup>1</sup>Division of Pulmonary and Critical Care Medicine, Dept of Medicine, Johns Hopkins University School of Medicine, Baltimore, MD, USA. <sup>2</sup>Division of Cardiology, Dept of Medicine, Johns Hopkins University School of Medicine, Baltimore, MD, USA.

Corresponding author: Paul M. Hassoun ([phassoun@jhmi.edu](mailto:phassoun@jhmi.edu))

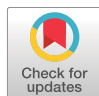

Shareable abstract (@ERSpublications)

Cardiac index may be misleading in risk assessment of patients with SSc-PAH. Stroke volume index is a more reliable predictor of clinical outcomes and right ventricular function and has the potential of improving existing risk stratification strategies. <https://bit.ly/3PhReKJ>

**Cite this article as:** Hassan HJ, Naranjo M, Kazzi B, *et al.* Risk assessment of systemic sclerosis-associated pulmonary arterial hypertension: cardiac index *versus* stroke volume index. *Eur Respir J* 2022; 60: 2200801 [DOI: 10.1183/13993003.00801-2022].

This single-page version can be shared freely online.

Copyright ©The authors 2022. For reproduction rights and permissions contact [permissions@ersnet.org](mailto:permissions@ersnet.org)

Received: 20 April 2022  
Accepted: 6 July 2022

*To the Editor:*

Pulmonary arterial hypertension (PAH) frequently complicates systemic sclerosis (SSc), with an estimated prevalence of 6.4–9% [1, 2]. Although survival has improved with the advent of PAH-specific therapy, SSc-PAH continues to have poor prognosis, with a 3-year survival of 67% [3]. Current PAH management guidelines highlight the importance of risk stratification in guiding therapy [4].
